# Supplementary material
Source: publisher figshare collection journal article supplement (https://frontiersin.figshare.com/ndownloader/files/26021699)
Supplement: Supplementary file 1 [file 26021699]

Supplementary Material

**Supplementary Table 1.** Transition probabilities for males (top) and females (bottom) when vessels were close (left, mean distance < 400 yd) and far (right, mean distance ≥ 400 yd) for each state: State 1 (travel/respiratory), State 2 (deep forage), State 3 (acoustic search), State 4 (intermediate dives).

|  |  | **To:** | **Close Vessels** | |  |  |  | **To:** | **Far Vessels** | |  |
| --- | --- | --- | --- | --- | --- | --- | --- | --- | --- | --- | --- |
|  |  | **State 1** | **State 2** | **State 3** | **State 4** |  |  | **State 1** | **State 2** | **State 3** | **State 4** |
|  | **From:**  **State 1** | **0.75** | **0.01** | **0.08** | **0.15** |  | **From:**  **State 1** | **0.74** | **0.02** | **0.06** | **0.17** |
| **Males** | **State 2** | **0.40** | **0.08** | **0.00** | **0.52** |  | **State 2** | **0.62** | **0.03** | **0.23** | **0.12** |
| **State 3** | **0.02** | **0.02** | **0.75** | **0.20** |  | **State 3** | **0.03** | **0.03** | **0.74** | **0.20** |
|  | **State 4** | **0.34** | **0.01** | **0.29** | **0.36** |  | **State 4** | **0.30** | **0.02** | **0.23** | **0.44** |
|  |  | **To:** |  |  |  |  |  | **To:** |  |  |  |
|  |  | **State 1** | **State 2** | **State 3** | **State 4** |  |  | **State 1** | **State 2** | **State 3** | **State 4** |
|  | **From:**  **State 1** | **0.67** | **0.00** | **0.01** | **0.31** |  | **From:**  **State 1** | **0.70** | **0.03** | **0.04** | **0.23** |
| **Females** | **State 2** | **0.61** | **0.00** | **0.19** | **0.19** |  | **State 2** | **0.21** | **0.00** | **0.44** | **0.34** |
| **State 3** | **0.01** | **0.03** | **0.88** | **0.09** |  | **State 3** | **0.02** | **0.02** | **0.82** | **0.14** |
|  | **State 4** | **0.54** | **0.00** | **0.25** | **0.21** |  | **State 4** | **0.30** | **0.03** | **0.17** | **0.50** |
